# Supplementary material for: Aβ1-42 and Tau as Potential Biomarkers for Diagnosis and Prognosis of Amyotrophic Lateral Sclerosis
Source: PubMed Central journal article supplement (PMC7216266; doi:10.3390/ijms21082911), 2020-04-21
Supplement: ijms-21-02911-s001.pdf [file ijms-21-02911-s001.pdf]

## A $\beta$ 1-42 and Tau as potential biomarkers for diagnosis and prognosis of amyotrophic lateral sclerosis.

Débora Lanznaster, Rudolf C. Hergesheimer, Salah Eddine Bakkouche, Stephane Beltran, Patrick Vourc'h, Christian Andres, Diane Dufour-Rainfray, Philippe Corcia and H  l  ne Blasco.

**Supplementary Table S1.** Cox proportional hazards model for survival and biomarkers analyzed at baseline.

| <b>Biomarker</b>           | <b>HR</b> | <b>95% CI</b> | <b><i>p</i></b> |
|----------------------------|-----------|---------------|-----------------|
| A $\beta$ 1-42             | -0.0003   | -0.001;0.0005 | 0.44            |
| Phospho-Tau                | -0.005    | -0.02;0.007   | 0.42            |
| Total Tau                  | -0.0002   | -0.002;0.001  | 0.78            |
| IATI                       | -0.09     | -0.45;0.29    | 0.63            |
| Ratio A $\beta$ 1-42/p-Tau | 0.005     | -0.02;0.03    | 0.67            |
| p-tau/total Tau            | -4.08     | -12.21;3.81   | 0.31            |

HR: Hazard ratio; 95% CI: 95% confidence interval
